# Supplementary material
Source: PubMed Central journal article supplement (PMC7007386)
Supplement: NIHMS1542452-supplement-1.pdf [file NIHMS1542452-supplement-1.pdf]

## Supplemental Information

### **Usp9x controls ankyrin-repeat domain protein homeostasis during dendritic spine development**

Sehyoun Yoon, Euan Parnell, Maria Kasherman, Marc P. Forrest, Kristoffer Myczek, Susitha Premarathne, Michelle C. Sanchez Vega, Michael Piper, Thomas H. J. Burne, Lachlan A. Jolly, Stephen A. Wood, and Peter Penzes

**A**

| Species         | Ankyrin repeat | 35            | 43                | 135                               | 148 | 256 | 289 |
|-----------------|----------------|---------------|-------------------|-----------------------------------|-----|-----|-----|
| M. musculus     | Ank3           | GHLEKALDY...  | HLEVVRFLDNGAS...  | HVASKRGNANMVKLLDRGAKIDAKTRDGLTPLH |     |     |     |
| H. sapiens      | Ank3           | GHLEKALDY...  | HLEVVRFLDNGAS...  | HVASKRGNANMVKLLDRGAKIDAKTRDGLTPLH |     |     |     |
| R. norvegicus   | Ank3           | GHLEKALDY...  | HLEVVRFLDNGAS...  | HVASKRGNANMVKLLDRGAKIDAKTRDGLTPLH |     |     |     |
| X. tropicalis   | Ank3           | GNLEKALDY...  | HLEVVRFLDNGAS...  | HVASKRGNANMVKLLDRGSKIDAKTRDGLTPLH |     |     |     |
| D. rerio        | Ank3           | GNLEKALDY...  | HLDVVRFLDNGAS...  | HVASKRGNANMVKLLDRGSKIDAKTRDGLTPLH |     |     |     |
| M. musculus     | Ank2           | GNLDKVVVEY... | HIDVVKYLLENGAN... | HVASKRGNANMVKLLDRGGQIDAKTRDGLTPLH |     |     |     |
| H. sapiens      | Ank2           | GNLDKVVVEY... | HIDVVKYLLENGAN... | HVASKRGNANMVKLLDRGGQIDAKTRDGLTPLH |     |     |     |
| R. norvegicus   | Ank2           | GNLDKVVVEY... | HIDVVKYLLENGAN... | HVASKRGNANMVKLLDRGGQIDAKTRDGLTPLH |     |     |     |
| X. tropicalis   | Ank2           | GNLDKVVVEY... | HIDVVKYLETGAN...  | HVASKRGNANMVKLLDRGGQIDAKTRDGLTPLH |     |     |     |
| D. rerio        | Ank2           | GNIDKVVVEY... | HLDVVRYLLENGAN... | YMASQENHLDVVRYLLENGNQSIATEDGFTPLA |     |     |     |
| D. melanogaster | Ank2           | GNLERVLEH...  | HVDAAKRLLYHRAP... | HVAAKWGKTMMVSLLEKGGNIEAKTRDGLTPLH |     |     |     |

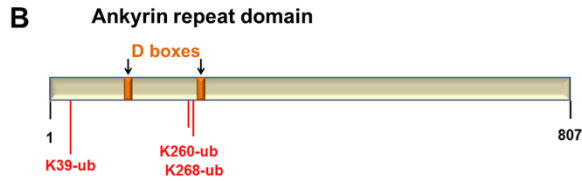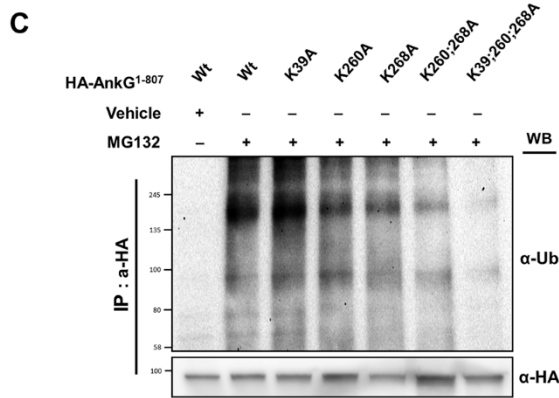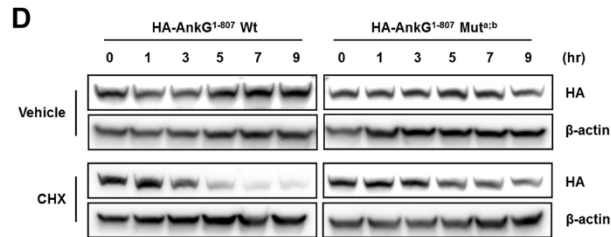

**Figure S1: Related to Figure 1. APC-mediated ubiquitinated ankyrin-G**

(A) Ubiquitinated lysine sites and the second D-box of ankyrin-G are conserved between ankyrin-B and ankyrin-G, and also conserved across different species. (B) Diagram of ubiquitinated lysine sites of ankyrin-G (C) The ubiquitinated lysine sites of ankyrin-G<sup>1-807</sup>. HEK293T cells were transfected with HA-ankyrin-G<sup>1-807</sup> or point-mutated constructs. At 24 h post-transfection, the transfected cells were treated with 10  $\mu$ M MG132 for an additional 16 h before harvesting for immunoprecipitation with  $\alpha$ -HA. The ubiquitinating ankyrin-G was detected using the anti-Ub antibody. (D) HEK293T cells were transfected with HA-ankyrin-G<sup>1-807</sup> or the D-box mutant. At 24 h post-transfection, the transfected cells were treated with 20  $\mu$ g/ml cycloheximide in HA-ankyrin-G<sup>1-807</sup> Wt or HA-ankyrin-G<sup>1-807</sup> Mut<sup>a;b</sup> overexpressing cells.

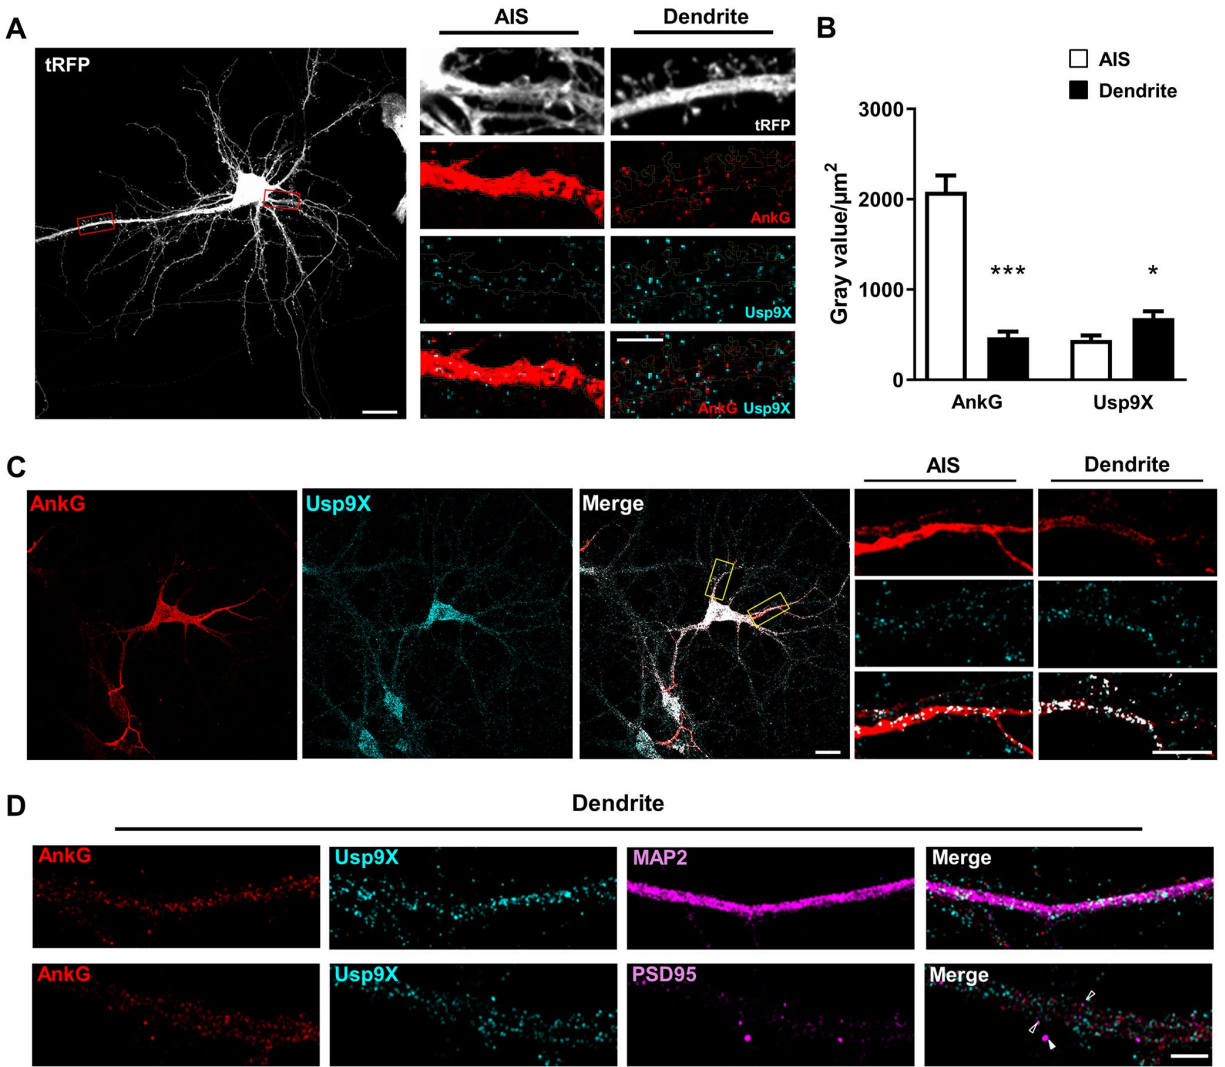

**Figure S2: Related to Figure 2. Expression patterns of ankyrin-G and Usp9X in cortical cultured neurons.**

(A) Confocal images of tRFP transfected neurons immunostained for ankyrin-G and Usp9X. Scale bar, 20μm (for the left panel) and 5μm (for right panel). (B) Bar graph comparing intensities of ankyrin-G and Usp9X in the axon initial segment (AIS) and dendrite of primary cultured cortical neurons (n = 9 cells; \*p = 0.0169; \*\*\*p < 0.001; Two-way ANOVA followed by Bonferroni post-tests. All data represent mean ± SEM. (C) Confocal image of a neuron showing the AIS and dendrite. Scale bar, 20μm (left); 10 μm (right). (D) Confocal images of neurons immunostained for ankyrin-G, Usp9X, and MAP2 or PSD95. Arrowheads show co-localized puncta. Scale bar, 5μm.

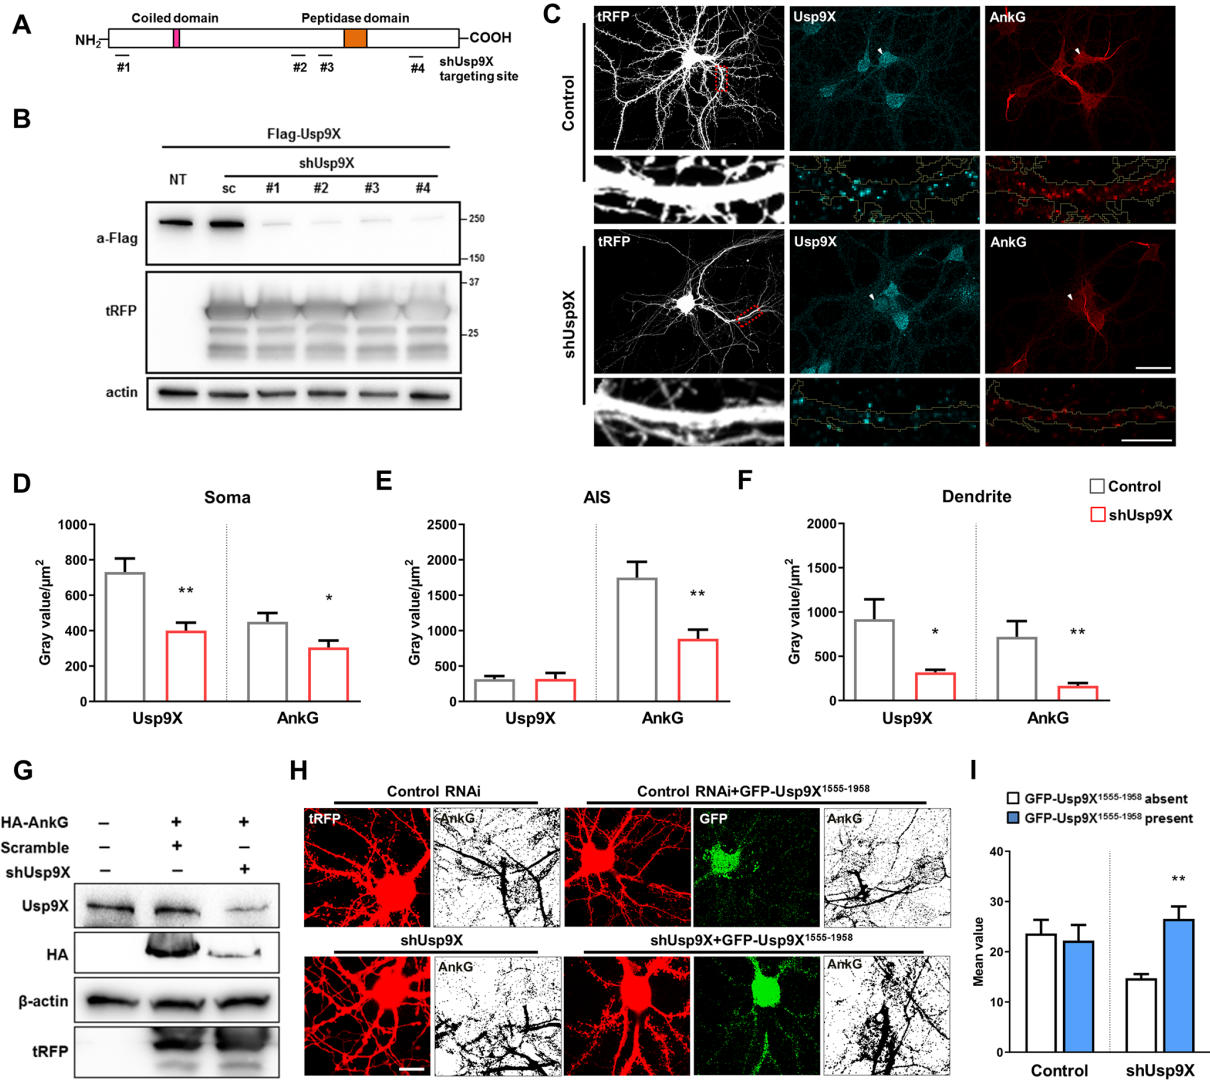

**Figure S3: related to Figure 3. The effect of shUsp9X on the expression level of ankyrin-G**

(A) Diagram of target sites of candidate Usp9X RNAi constructs. (B) Knock-down of Flag-Usp9X in HEK293T cells. SDS-PAGE and western blot of lysates from HEK293T cells expressing Flag-Usp9X alone or with control or candidate RNAi constructs. RNAi construct 4 was used for knockdown experiments. (C) Confocal images of neurons expressing control or Usp9X RNAi (shUsp9X) and immunostained with antibodies to ankyrin-G (red) and Usp9X (cyan). Arrowhead indicates control or shUsp9X expressed neuron. Scale bar, 40  $\mu\text{m}$  (upper panel); 5  $\mu\text{m}$  (lower panel). (D-F) Graph comparing intensities of ankyrin-G and Usp9X fluorescence in the soma or AIS or dendrite of cultured cortical neurons expressing control or shUsp9X constructs (n = 9 per each condition; \*p < 0.05; \*\*p < 0.01; followed by two-tailed unpaired Student's t-test). (G) Representative western blot for Usp9X-dependent expression level of ankyrin-G. N2a cells were transfected with HA-ankyrin-G and control or Usp9X RNAi constructs. At 48 h post-transfection, the transfected cells were harvested for immunoblotting. (H) Confocal images of control and knockdown neurons co-expressing GFP-Usp9X<sup>1555-1958</sup> construct. The signal of ankyrin-G was thresholded at an identical value. Scale bar, 10  $\mu\text{m}$ . (I) Graph comparing intensities of ankyrin-G fluorescence in the soma of cortical neurons expressing control or shUsp9X constructs (n = 8 per each condition; \*\*p < 0.01). Repeated measures two-way ANOVA followed by Bonferroni post-tests. All data represent mean  $\pm$  SEM.

**A**

```

HUSP9X 1555 GFVELNKAAGTCYVNSVLDQLVMIPISRNGILAIETGSDVDDDDMSGDEKGDNSVNDPDDVDFVYQQDFEDKFLASLSTEDRREKYNIGVLRHLOVIFQHLAASRLQYVYPRGPKQDFLWEPVNLREHGDALFFNSVLDLDELKALG 1795
SUOX_A 1IGVYGLKNGDGTCTYNSLLQTLFFTNQLRKAYVMPTEG.....DSDSK-SVPLALGRVYFELQH.....SDPKVY-TKKLTWET-LDSFMQHDVQELCRVLLDNVENKMGKTC 104
3M9B_A 1IGLSGLIMNGSTCFMSSILQCLYFIHRSMSQIHNSNCKV.....DK-CFSCALDKIVHLYGAL-S.....TNRDTGTYLLTKINQ.....QDAHEFWFIIHQIHQVLDLPN 105
3M9F_A 1IGLSGLIMNGSTCFMSSILQCLYFIHRSMSQIHNSNCKV.....RSPDK-CFSCALDKIVHLYGAL-NTNRDTGTYLLTKINQ.....NDAHEFWFIIHQIHQVLDLPN 109
4F9P_A 1IGLSGLIMNGSTCFMSSILQCLYFIHRSMSQIHNSNCKV.....RSPDK-CFSCALDKIVHLYGAL-N-TNRDTGTYLLTKINQ.....NDAHEFWFIIHQIHQVLDLPN 109
AZUK_U 1HYFGLVNFONTCYNSVLAQLYFCRPFREKVLAYKSGK.....-KES-LLTC-LADLFHSIATQK-KKGVIPPKKFIIRLRKKNELFDNYMQDAHEFLNVLNTIADILOEER 106
SK16_A 1---LVNFONTCYNSVLAQLYFCRPFREKVLAYKSGK.....-KES-LLTC-LADLFHSIATQK-KKGVIPPKKFIIRLRKKNELFDNYMQDAHEFLNVLNTIADILOEER 74
SLB1_A 1HYFGLVNFONTCYNSVLAQLYFCRPFREKVLAYKAGG.....KKKEN-LLTC-LADLFHSIATQK-KKGVIPPKKFIIRLRKKNELFDNYMQDAHEFLNVLNTIADILOEER 108
SK18_A 1---GLVNFONTCYNSVLAQLYFCRPFREKVLAYKSGK.....-KES-LLTC-LADLFHSIATQK-KKGVIPPKKFIIRLRKKNELFDNYMQDAHEFLNVLNTIADILOEER 95
SLB3_A 1HYFGLVNFONTCYNSVLAQLYFCRPFREKVLAYKSGK.....KKKEN-LLTC-LADLFHSIATQK-KKGVIPPKKFIIRLRKKNELFDNYMQDAHEFLNVLNTIADILOEER 108
SCVM_A 1HYFGLVNFONTCYNSVLAQLYFCRPFREKVLAYKAGG.....KKKEN-LLTC-LADLFHSIATQK-KKGVIPPKKFIIRLRKKNELFDNYMQDAHEFLNVLNTIADILOEER 108

HUSP9X 1706 HPAMLSKVLGSGFADDKICGCPHRYECEEFSTTLNVDIRNQKLLDSLQYVKGDLLEGANAYHCECKNKVDYVKKRLLIKKLPVLAIQLRKFDYDWERECALFKNDYFEPPELDMPEYTVAGVAKLEGQVNVNPESQLIQSQEQSESE 1856
SUOX_A 165VEGTIPIKLFGRKMVSIYOCKEVDYRSDRREYDYLQISIKGKKNIFESVDYVAVEQLDGGNKYDAGE-HOLQEAEGVFLTLPVHLQLMRFMFYDQTDQNIKINDRFEPEQLPLDEFLOKTDPKOPAN..... 226
SUOX_A 165VEGTIPIKLFGRKMVSIYOCKEVDYRSDRREYDYLQISIKGKKNIFESVDYVAVEQLDGGNKYDAGE-HOLQEAEGVFLTLPVHLQLMRFMFYDQTDQNIKINDRFEPEQLPLDEFLOKTDPKOPAN..... 226
3M9B_A 166AECIVHTVFEGSLESSIVCPGCDNNKSTIIDFLDLSLDIKDKKKLYECLDSFHKKELK-DFN.....-AIKQGIHKLPSVLVQLKRFHEHLN-GSNRKLDDFIEPTYLNMKNYCS.....VFD..... 228
3M9F_A 166AECIVHTVFEGSLESSIVCPGCDNNKSTIIDFLDLSLDIKDKKKLYECLDSFHKKELK-DFN.....-GECN.....-AIKQGIHKLPSVLVQLKRFHEHLN-GSNRKLDDFIEPTYLNMKNYCS.....KVPD..... 234
4F9P_A 166AECIVHTVFEGSLESSIVCPGCDNNKSTIIDFLDLSLDIKDKKKLYECLDSFHKKELK-DFN.....-GECN.....-AIKQGIHKLPSVLVQLKRFHEHLN-GSNRKLDDFIEPTYLNMKNYCS.....KVPD..... 234
AZUK_U 166AECIVHTVFEGSLESSIVCPGCDNNKSTIIDFLDLSLDIKDKKKLYECLDSFHKKELK-DFN.....-GECN.....-AIKQGIHKLPSVLVQLKRFHEHLN-GSNRKLDDFIEPTYLNMKNYCS.....KVPD..... 234
SK16_A 167KPTWVHIEIQDGLTNETRCLTCTETISSKDEDFLDSVDVEQNTSITINCLRQFSNTEIT---KYYCECRSKQEAHNRKMKVVKLPMIALHLKRFKYMQLHRYTKLSYRVVFPLELRFNTSG---DATNPD..... 238
SK16_A 75KPTWVHIEIQDGLTNETRCLTCTETISSKDEDFLDSVDVEQNTSITINCLRQFSNTEITCSEYKYCCESRQKQEAHNRKMKVVKLPMIALHLKRFKYMQLHRYTKLSYRVVFPLELRFNTSG---DATNPD..... 173
SLB1_A 169KLTWVHIEIQDGLTNETRCLNCEYVSSKDEDFLDSVDVEQNTSITINCLRQFSNTEITCSEYKYCCESRQKQEAHNRKMKVVKLPMIALHLKRFKYMQLHRYTKLSYRVVFPLELRFNTSG---LO..... 236
SK18_A 96KPTWVHIEIQDGLTNETRCLTCTETISSKDEDFLDSVDVEQNTSITINCLRQFSNTEITCSEYKYCCESRQKQEAHNRKMKVVKLPMIALHLKRFKYMQLHRYTKLSYRVVFPLELRFNTSG---KVFPELELRF.....PD..... 260
SLB3_A 169KPTWVHIEIQDGLTNETRCLTCTETISSKDEDFLDSVDVEQNTSITINCLRQFSNTEITCSEYKYCCESRQKQEAHNRKMKVVKLPMIALHLKRFKYMQLHRYTKLSYRVVFPLELRFNTSG---DATNPD..... 244
SCVM_A 169KLTWVHIEIQDGLTNETRCLNCEYVSSKDEDFLDSVDVEQNTSITINCLRQFSNTEITCSEYKYCCESRQKQEAHNRKMKVVKLPMIALHLKRFKYMQLHRYTKLSYRVVFPLELRFNTSG---DATNPD..... 233

HUSP9X 1827TAGSIKYRLVGLVHSGGASGGHYYSYIQRNGDGERRWYKFDGDDVIT 1906
SUOX_A 227---YILHAVLHSGDNGHGHVYVYVLPNGKGD---KWCKFDGDDVVS 334
SUOX_A 229---YILHAVLHSGDNGHGHVYVYVLPNGKGD---KWCKFDGDDVVS 319
3M9B_A 227---YIELGIVSHKGTINEGHYIAFCIKSGG---QWFKFNDMSVS 268
3M9F_A 235---YIELGIVSHKGTINEGHYIAFCIKSGG---QWFKFNDMSVS 287
4F9P_A 233---YIELGIVSHKGTINEGHYIAFCIKSGG---QWFKFNDMSVS 315
AZUK_U 230---YIELGIVSHKGTINEGHYIAFCIKSGG---QWFKFNDMSVS 312
SK16_A 239---RMVDLAVVHCGSPNRRGHYIAIKVSHD---FWLFDDDIVE 368
SK16_A 178---RMVDLAVVHCGSPNRRGHYIAIKVSHD---FWLFDDDIVE 239
SLB1_A 237---RMVDLAVVHCGSPNRRGHYIAIKVSHD---FWLFDDDIVE 369
SK18_A 201---RMVDLAVVHCGSPNRRGHYIAIKVSHD---WLLFDDDIVE 284
SLB3_A 245---RMVDLAVVHCGSPNRRGHYIAIKVSHD---FWLFDDDIVE 317
SCVM_A 245---RMVDLAVVHCGSPNRRGHYIAIKVSHD---FWLFDDDIVE 317

```

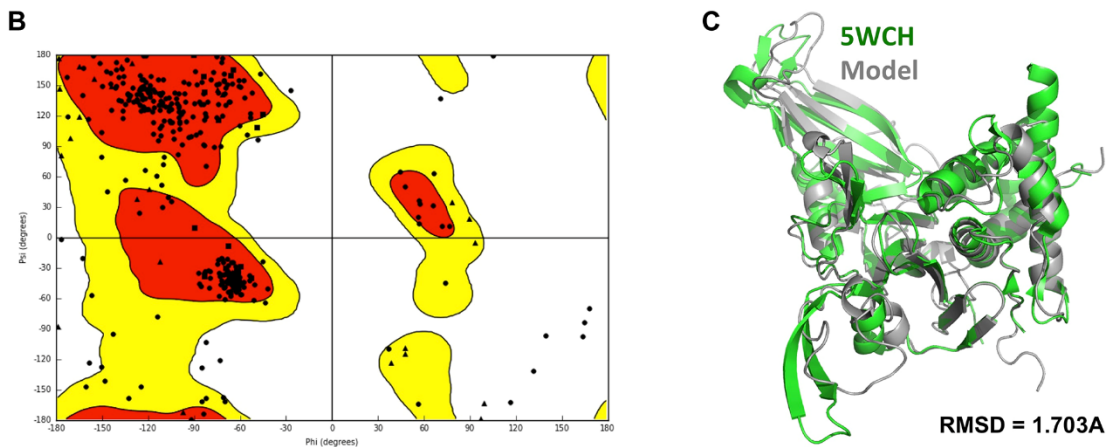

**Figure S4: Related to Figure 4. Homology model generation.**

(A) The sequence of human *USP9X* (*hUSP9X*) DUB domain 1555-1906 was aligned to multiple known DUB structures in order to generate a homology model. Insertions into *USP9X* (indicated by red squares) with no structural templates were modelled ab initio. Blue lines indicate regions of aligned structural templates not used for modeling, due to absence from *USP9X*. (B) Ramachandran plot of novel model showing > 95% amino acids is within accepted backbone torsion angles. (C) Alignment of conserved structural elements of homology model generated with *Usp9X* crystal structure 5WCH showing root mean square deviation between backbone carbons. Regions generated ab initio were not aligned, as these regions are absent from crystal structure 5WCH, likely due to flexibility or crystallization methods.

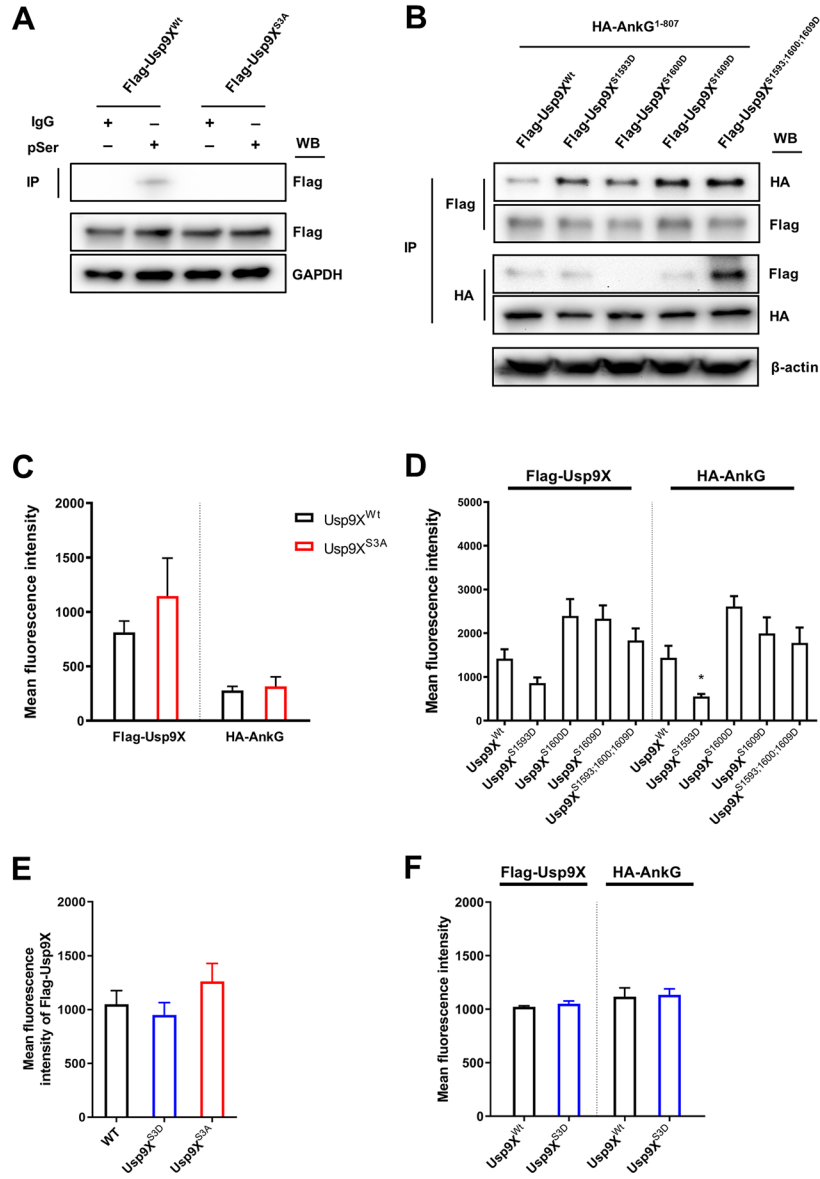



**Figure S5: Related to Figure 4. The effect of phosphomimetic mutants of Usp9X on the interaction with ankyrin-G and the expression levels of transfected constructs.**

(A) Representative Western blot of co-immunoprecipitation experiments of the Flag-Usp9X<sup>1555-1958</sup> (Flag-Usp9X<sup>Wt</sup>) or Flag-Usp9X<sup>S3A</sup> constructs with  $\alpha$ -phosphoserine from HEK293T cells. (B) Representative Western blot of the HA-ankyrin-G<sup>1-807</sup> with co-expressed Flag-Usp9X<sup>1555-1958</sup> Wt or S1593D, S1600D, S1609D, S3D from HEK293T cells. (C) Measurement of mean fluorescence intensity from confocal images. Co-expressed HA-ankyrin-G<sup>1-807</sup> and Flag-Usp9X<sup>1555-1958</sup> Wt or S3A signals in HEK293T cells were measured through outlining cellular boundary by a volumetric way (0.4  $\mu$ m interval and 5.2  $\mu$ m depth; Usp9X<sup>Wt</sup> control, n = 16; Usp9X<sup>S3A</sup> control, n = 9). The graph is related to Figure 4C. (D) Measurement of mean fluorescence intensity from confocal images. Co-expressed HA-ankyrin-G<sup>1-807</sup> and Flag-Usp9X<sup>1555-1958</sup> Wt, S1593D, S1600D, S1690D, or S3D signals in HEK293T cells were measured through outlining cellular boundary by a volumetric way (0.4  $\mu$ m interval and 4.8  $\mu$ m depth; n=20 from each condition; \*p < 0.05). Two-way ANOVA followed by Bonferroni post-tests. The graph is related to Figure 4D. (E) Graph comparing mean intensities of Flag-Usp9X<sup>1555-1958</sup> Wt, S3D, or S3A fluorescence in dendrites of cortical neurons (n = 16 from each condition). The graph is related to Figure 4H. (F) Graph comparing mean intensities of HA-ankyrin-G and Flag-Usp9X<sup>1555-1958</sup> Wt or S3D fluorescence in dendrites of cortical neurons (n = 13 from each condition). The graph is related to Figure 4J. All data represent mean  $\pm$  SEM.

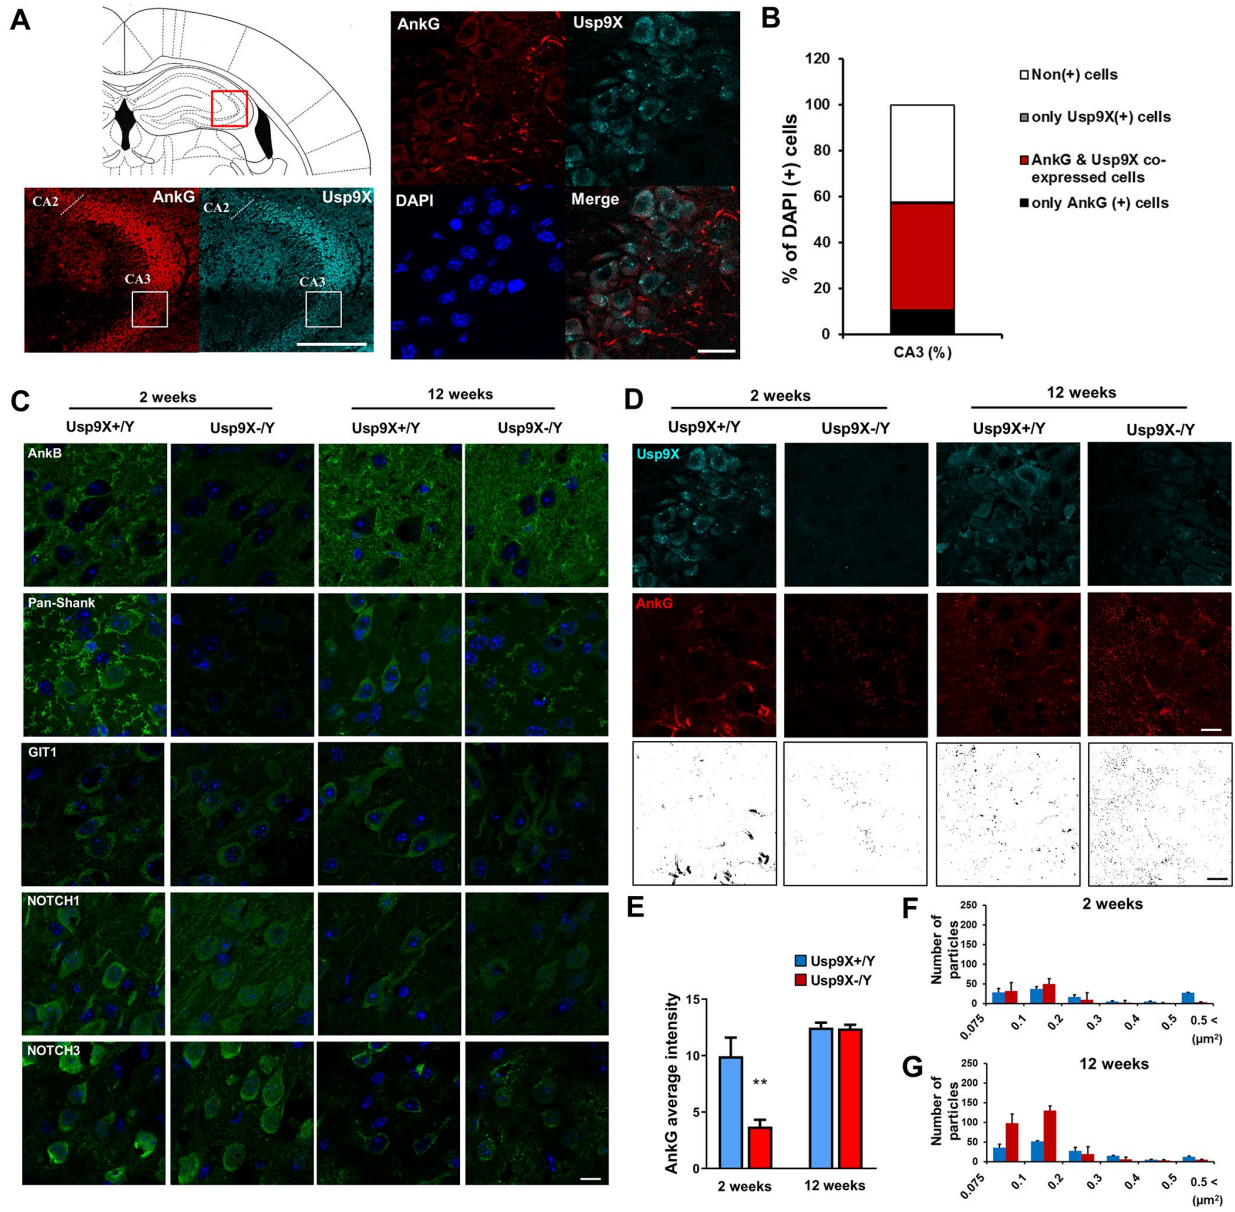

**Figure S6: Related to Figure 5 and 6. Expression patterns of ankyrin-G and Usp9X**

(A) Double-immunohistochemical staining of ankyrin-G (detected in green) with Usp9X (detected in red) in the hippocampus (Bregma -1.70 mm) of 12 weeks old mouse brain. Hippocampal expression patterns of ankyrin-G and Usp9X are shown in the left panel (Scale bar, 200  $\mu\text{m}$ ) and magnified CA3 region is shown in right panel as a representative image (Scale bar, 20  $\mu\text{m}$ ). (B) Representative graph of the fraction of ankyrin-G (red and black) or Usp9X (grey and red)-positive cells and quantification of the two cell types ( $n = 5$ ) in CA3 of the hippocampus. The red bar represents co-expressed cells of both ankyrin-G and Usp9X. The graph is shown with mean values. (C) Representative image of immunohistochemical staining with ankyrin-B, Pan-Shank, GIT1, Notch1, or Notch3 (detected in green) in the layer III of cortex from 2 or 12 weeks old mouse brain of Usp9X<sup>+Y</sup> or Usp9X<sup>-Y</sup> mice (Scale bar, 10  $\mu\text{m}$ ). (D) Representative image of double-immunohistochemical staining with ankyrin-G (detected in green) and Usp9X (detected in red) in the hippocampus of 2 or 12 weeks old mouse brain from Usp9X<sup>+Y</sup> or Usp9X<sup>-Y</sup> mice (Scale bar, 200  $\mu\text{m}$ , top). CA3 specific expression patterns of ankyrin-G and Usp9X are magnified (Scale bar, 20  $\mu\text{m}$ , bottom). (E) The ankyrin-G average intensity is measured in each group by ImageJ ( $n = 4$  from 4 mice per each group;  $**p < 0.01$ ). Two-way ANOVA followed by Bonferroni post-tests. (F-G) The number of ankyrin-G particles based on the bottom images of (D) is counted and categorized by particle size; less than 0.075  $\mu\text{m}^2$  is excluded for analysis ( $n = 4$  from 4 mice per each group).

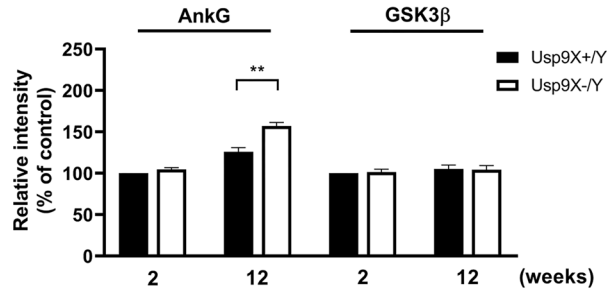

**Figure S7: Related to Figure 6. Basal intensity of Western blot of immunoprecipitated ankyrin-G or GSK3β by α-Ub from Figure 6B.** Intensity of Western blot of immunoprecipitated ankyrin-G or GSK3β by α-Ub (Fig. 6B) was measured (Usp9X<sup>+/Y</sup>, n = 4 and Usp9X<sup>-/Y</sup>, n = 3 in 2 weeks old; Usp9X<sup>+/Y</sup>, n = 4 and Usp9X<sup>-/Y</sup>, n = 4 in 12 weeks old). \*\*p < 0.01; Two-tailed unpaired t-test was performed.

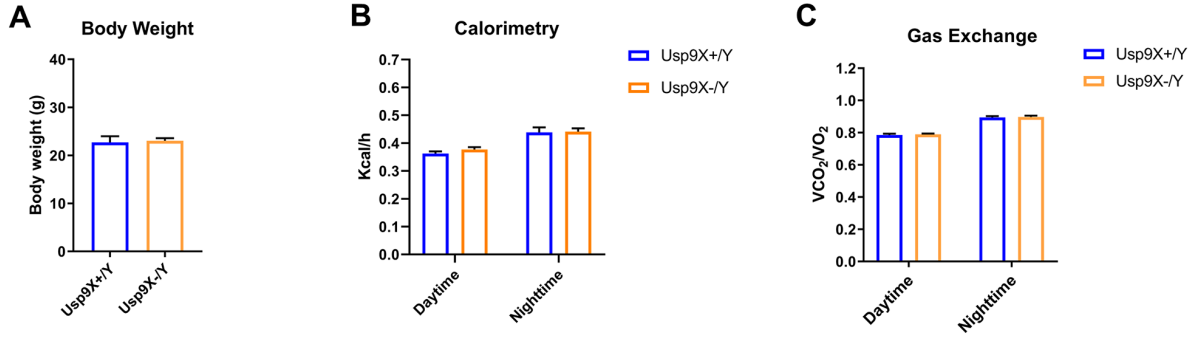

**D**

| Family   | Chromosome        | Variant Details |              | Denovo | Gnomad Allele Frequency | Prediction Algorithms |           |                      |                     |            |             |
|----------|-------------------|-----------------|--------------|--------|-------------------------|-----------------------|-----------|----------------------|---------------------|------------|-------------|
|          |                   | cDNA            | Protein      |        |                         | SIFT Score            | SIFT Pred | Polyphen2_HVAR Score | Polyphen2_HVAR Pred | CADD Score | GERPN Score |
| USA 13   | ChrX GRCh37(hg19) | c.4718A>G       | p.Gln1573Leu | Yes    | 0                       | 0.76                  | T         | 0.952                | Pr                  | 22.8       | 5.49        |
| France 1 |                   | c.5669G>A       | p.Gly1890Glu | No     | 1.12E-05                | 0.267                 | T         | 0.002                | B                   | 15.6       | 4.93        |
| USA 4    |                   | c.5669G>A       | p.Gly1890Glu | No     | 1.12E-05                | 0.267                 | T         | 0.002                | B                   | 15.6       | 4.93        |

**E**

**p.Gln1573Leu**

*Homo sapiens* 1560 KNA GAT CY MNSVI QQLYMI PSI RNGI LAI EGT GSDVDDDDMSGDEKQD - - - NESNVDPRDDVF GY 1620  
*Mus musculus* KNA GAT CY MNSVI QQLYMI PSI RNGI LAI EGT GSDVDDDDMSGDEKQD - - - NESNVDPRDDVF GY  
*Xenopus tropicalis* KNA GAT CY MNSVI QQLYMI PAI RNGI LAI EGT GSDVDDDDMSGDEKQD - - - NESNVDPRDDVF GY  
*Danio Rerio* KNA GAT CY MNSVI QQLYMI PPI RNGI LAI EGT GSDVDDDDMSGDEKQD - - - NESNVDPRDDVF GY  
*Drosophila melanogaster* KNA GAT CY MNSVL QQLYMVPAVRVGI LRAHGAATT DGEDF S GSDLT GGGLGSALF SGPASALVSL  
*Homo sapiens USP9Y* KNA GAT CY MNSVI QQLYMI PSI RNSI LAI EGT GSDLHDDMF GDEKQD - - - SESNVDPRDDVF GY

*Homo sapiens* 1710 LSKVLGGSFADQKI CQGGCPHRYECEEFSFTTLNVDI RNHQNL L DLSLEQYVKGD LLEGANAYHC 1770  
*Mus musculus* LSKVLGGSFADQKI CQGGCPHRYECEEFSFTTLNVDI RNHQNL L DLSLEQYVKGD LLEGANAYHC  
*Xenopus tropicalis* LSKVLGGSFADQKI CQGGCPHRYECEEFSFTTLNVDI RNHQNL L DLSMEQYVKGD LLEGANAYHC  
*Danio Rerio* LSKVLGGSFADQKI CQGGCPHRYECEEFSFTTLNVDI RNHQNL L DLSMEQYVKGD LLEGANAYHC  
*Drosophila melanogaster* MNATLGGSFSDQKI CQEGCPHRYSKKEEFSVF SVDI RNHSLTESLEQYVKGELLEGA DAYHC  
*Homo sapiens USP9Y* LSKVLGGSFADQKI CQGGCPHRYECEEFSFTTLNVDI RNHQNL L DLSLEQYI KGD LLEGANAYHC

**p.Gly1890Glu**

*Homo sapiens* 1850 SEQSESETAGSTKYRLVGVLVHSGQASGGHYYSYI I QRN - GGDGERNRWWKFDDGDVTECKM 1910  
*Mus musculus* NEQSESEKAGSTKYRLVGVLVHSGQASGGHYYSYI I QRN - GGDGEKNRWWKFDDGDVTECKM  
*Xenopus tropicalis* NDQTE NEPPVSSKYRLVGVLVHSGQASGGHYYSYI I QRN - GGDGEKNRWWKFDDGDVTECKM  
*Danio Rerio* NEFSEPEPPCSSRYRLVGVLVHSGQASGGHYYSYI I QRN GSGEGERNRWWKFDDGDVTECKM  
*Drosophila melanogaster* GDNCGT N - VETTKYELTGI VVHSGQASGGHYFSYI LSKN - - PAN GKQWKFDDGEVTECKM  
*Homo sapiens USP9Y* KEQSDNETAGGTYRLVGVLVHSGQASGGHYYSYI I QRN - GKDDQT DHWWKFDDGDVTECKM

**F**

| Variant                      | USA 13       | France 1     | USA 4        |
|------------------------------|--------------|--------------|--------------|
|                              | p.Gln1573Leu | p.Gly1890Glu | p.Gly1890Glu |
| <b>Neurological Features</b> |              |              |              |
| ID                           | n/a          | Yes          | Yes          |
| DD                           | Yes          | Yes          |              |
| Speech Delay                 | Yes          | Yes          |              |
| Autistic Behaviour           | No           | Yes          | Yes          |
| Seizures / Epilepsy          | No           | No           |              |
| Hypotonia                    | Yes          | n/a          |              |
| Motor Disability             | Yes          | Yes          |              |
| Ataxia                       | No           | N/A          |              |
| Visual impairment            | Yes          | Yes          |              |
| Deafness                     | No           | n/a          |              |

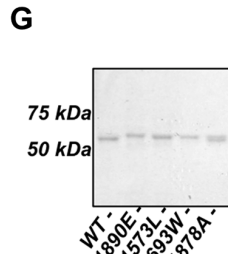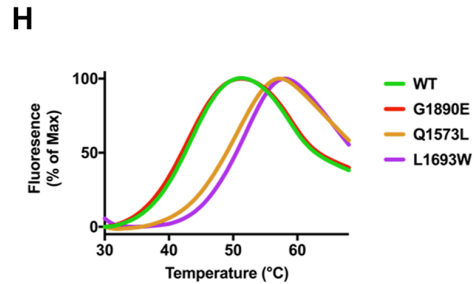

**Figure S8: Related to Figure 7. USP9X missense variants within the catalytic domain are associated with neurodevelopmental disorders.**

(A) Body weight is unchanged across genotypes. (B) The amount of kilocalories consumed per an hour. (C) The amount of gas exchange. *Usp9X*<sup>+Y</sup>, n=6; *Usp9X*<sup>-Y</sup>, n=12 from all experiments. (D) Two unique missense variants were identified through whole exome or whole genome sequencing with no other plausible variants discovered. One of the variants arose de novo, the other was maternally inherited. All variants are extremely rare, not seen in Gnomad resource (138K exomes/genomes of individuals without neurodevelopmental disorders). All variants were predicted to be potentially disease causing by CADD (CADD score  $\geq 20$ ), and affect highly conserved residues (GERPN  $> 5$ ). Effect on protein structure was predicted to be variable (SIFT: T=tolerated; Polyphen: B=benign, Pr=probably damaging.). (E) Missense variants affect highly conserved amino acids. Multiple species alignment of USP9X protein sequence showing location of variants. Numbers relate to human USP9X reference sequence. (F) *USP9X* variants are associated with various neurodevelopmental disorders. Summary of neurological features associated with each case. ID: intellectual disability; DD: developmental delay; ASD: autism spectrum disorder. (G) Mouse *Usp9X* and the indicated mutants were recombinantly expressed, purified to greater than 95% purity and equilibrated as assessed by SDS page. Equilibrated protein was used for all subsequent experiments. (H) Fluorescence thermal shift was performed using 0.5  $\mu\text{g}$  of the indicated mutants were incubated with Sypro orange (5x concentration) and subjected to a melt curve from 4–95  $^{\circ}\text{C}$  with fluorescence recorded at 0.5  $^{\circ}\text{C}$  intervals (samples run in quadruplicate with data normalized to max fluorescence and cropped to melt peak).

Table S1: Related to Figure 1. The prediction of D-box and KEN box results for the mouse ankyrin-G (National Center for Biotechnology Information accession number NM\_146005) are shown.

| Position    | Peptide                     | Score  | Cutoff | Type    |
|-------------|-----------------------------|--------|--------|---------|
| 140 - 143   | ENHLEV <b>VRF</b> LLDNGASQS | 2.486  | 0      | D-box   |
| 282 - 285   | AKIDAK <b>TRDGL</b> TPLHCGA | 3.608  | 0      | D-box   |
| 1028 - 1031 | ITCRLV <b>KRHKL</b> ANPPPMV | 3.486  | 0      | D-box   |
| 1177 - 1180 | GALTKRIR <b>VGL</b> QAQPVE  | 3.081  | 0      | D-box   |
| 1283 - 1286 | FTTNVSAR <b>FWL</b> ADCHQVL | 3.095  | 0      | D-box   |
| 1392 - 1394 | VFNFYS <b>FKEN</b> RLPFSIK  | 10.75  | 0      | KEN-box |
| 1773 - 1776 | AMLNRV <b>QRAEL</b> AMSSLAG | 4.027  | 0      | D-box   |
| 1865 - 1867 | DIGK <b>QSIKEN</b> LKPKTHG  | 10.727 | 0      | KEN-box |
| 1925 - 1928 | TTADG <b>KARLNL</b> QEEEGST | 3.568  | 0      | D-box   |

Residues defining the D-box and KEN box are marked in bold.

Table S3: Related to Figure 5. The ubiquitinated lysine sites of ANKRD in ANKRD containing psychiatric risk genes

| Gene symbol      | ACC_ID | The N. of amino acids | ANKRD     | Human         | Mouse (homologous sequence)                    | Rat (homologous sequence) | Ub-Lysine | PSD protein | D-box | KEN box |
|------------------|--------|-----------------------|-----------|---------------|------------------------------------------------|---------------------------|-----------|-------------|-------|---------|
| <i>ANK3</i>      | Q12955 | 4377                  | 73~825    |               | 260, 268                                       |                           | yes       | yes         | yes   | no      |
| <i>TRANK1</i>    | O15050 | 2925                  | 168~575   | 561           |                                                |                           | yes       | no          | yes   | no      |
| <i>ABTBI</i>     | Q969K4 | 478                   | 1~64      |               |                                                | N/A                       | no        | no          | yes   | no      |
| <i>AGAP1</i>     | Q9UPQ3 | 857                   | 768~830   |               |                                                |                           | no        | yes         | yes   | no      |
| <i>AGAP2</i>     | Q99490 | 1192                  | 1090~1152 |               |                                                |                           | no        | yes         | yes   | no      |
| <i>ANK1</i>      | P16157 | 1881                  | 44~795    | 436, 454, 534 | 55, 165, 266, 299, 450, 607, 662, 685          | 63                        | yes       | yes         | yes   | no      |
| <i>ANK2</i>      | Q01484 | 3957                  | 30~822    |               | 46, 52, 118, 223, 275, 330, 382, 572, 749, 802 | 52, 118                   | yes       | yes         | yes   | no      |
| <i>ANKDD1A</i>   | Q495B1 | 522                   | 14~385    |               |                                                | N/A                       | no        | no          | yes   | no      |
| <i>ANKFN1</i>    | Q8N957 | 763                   | 136~202   |               |                                                |                           | no        | no          | yes   | no      |
| <i>ANKK1</i>     | Q8NFD2 | 765                   | 361~753   | 702           |                                                | N/A                       | yes       | no          | yes   | no      |
| <i>ANKRD11</i>   | Q6UB99 | 2663                  | 167~292   |               |                                                |                           | no        | no          | no    | no      |
| <i>ANKRD13 B</i> | Q86YJ7 | 626                   | 47~109    |               |                                                |                           | no        | no          | yes   | no      |
| <i>ANKRD17</i>   | O75179 | 2603                  | 233~1414  |               |                                                |                           | no        | no          | yes   | no      |
| <i>ANKRD22</i>   | Q5VYY1 | 191                   | 39~163    | N/A           | N/A                                            | N/A                       | no        | no          | yes   | no      |
| <i>ANKRD23</i>   | Q86SG2 | 305                   | 143~271   |               |                                                | 258                       | yes       | no          | yes   | no      |
| <i>ANKRD27</i>   | Q96NW4 | 1050                  | 396~871   | 411           | 764                                            |                           | yes       | no          | yes   | no      |
| <i>ANKRD30 B</i> | Q9BXX2 | 1392                  | 72~233    |               | N/A                                            | N/A                       | no        | no          | yes   | no      |
| <i>ANKRD50</i>   | Q9ULJ7 | 1429                  | 477~1107  |               |                                                |                           | no        | no          | yes   | no      |
| <i>ANKS1A</i>    | Q92625 | 1134                  | 79~275    |               | 198                                            |                           | yes       | no          | no    | no      |
| <i>ASAP1</i>     | Q9ULH1 | 1129                  | 600~665   |               |                                                |                           | no        | yes         | no    | no      |
| <i>ASAP2</i>     | O43150 | 1006                  | 584~649   |               |                                                |                           | no        | no          | yes   | no      |
| <i>ASBI</i>      | Q9Y576 | 335                   | 36~265    | 69            |                                                | N/A                       | yes       | no          | yes   | no      |



|                      |        |      |           |                                      |          |     |     |     |     |    |
|----------------------|--------|------|-----------|--------------------------------------|----------|-----|-----|-----|-----|----|
| <i>ASB11</i>         | Q8WXH4 | 323  | 64~256    |                                      |          | N/A | no  | no  | yes | no |
| <i>ASB14</i>         | A6NK59 | 587  | 82~449    |                                      |          | N/A | no  | no  | yes | no |
| <i>ASB15</i>         | Q8WXK1 | 588  | 110~444   |                                      | 133      | N/A | yes | no  | yes | no |
| <i>ASB17</i>         | Q8WXJ9 | 295  | 146~176   |                                      |          | N/A | no  | no  | no  | no |
| <i>ASB4</i>          | Q9Y574 | 426  | 74~280    |                                      |          |     | no  | no  | yes | no |
| <i>ASZ1</i>          | Q8WWH4 | 475  | 45~243    |                                      |          |     | no  | no  | yes | no |
| <i>BCORL1</i>        | Q5H9F3 | 1711 | 1455~1549 |                                      | 1491     | N/A | yes | no  | no  | no |
| <i>BTBD11</i>        | A6QL63 | 1104 | 603~854   |                                      |          | N/A | no  | no  | yes | no |
| <i>CTTNBP2</i>       | Q8WZ74 | 1663 | 709~942   |                                      |          |     | no  | yes | yes | no |
| <i>DAPK1</i>         | P53355 | 1430 | 378~638   |                                      |          |     | no  | yes | yes | no |
| <i>ESPN</i>          | B1AK53 | 854  | 1~300     |                                      |          |     | no  | no  | yes | no |
| <i>GIT1</i>          | Q9Y2X7 | 761  | 132~228   |                                      |          |     | no  | yes | no  | no |
| <i>GIT2</i>          | Q14161 | 759  | 132~228   |                                      |          |     | no  | no  | no  | no |
| <i>HACE1</i>         | Q8IYU2 | 909  | 64~257    |                                      |          |     | no  | no  | yes | no |
| <i>HECTD1</i>        | Q9ULT8 | 2610 | 395~612   | 461, 466, 522                        |          |     | yes | no  | no  | no |
| <i>KANK1</i>         | Q14678 | 1352 | 1161~1329 |                                      |          |     | no  | no  | no  | no |
| <i>LRRK1</i>         | Q38SD2 | 2015 | 86~222    |                                      |          | N/A | no  | no  | yes | no |
| <i>MIB1</i>          | Q86YT6 | 1006 | 430~729   | 437, 481, 485, 495,<br>618, 691, 726 | 485, 726 | N/A | yes | no  | yes | no |
| <i>MPHOSPH<br/>8</i> | Q99549 | 860  | 600~728   | 623, 708                             |          |     | yes | no  | no  | no |
| <i>NFKBIL1</i>       | Q9UBC1 | 381  | 64~130    |                                      |          | N/A | no  | no  | no  | no |
| <i>NOTCH1</i>        | P46531 | 2555 | 1928~2122 |                                      |          |     | no  | no  | yes | no |
| <i>NOTCH3</i>        | Q9UM47 | 2321 | 1838~2000 |                                      |          | N/A | no  | no  | yes | no |
| <i>POTEH</i>         | Q6S545 | 545  | 180~404   |                                      | N/A      | N/A | no  | no  | yes | no |
| <i>PPP1R13B</i>      | Q96KQ4 | 1090 | 920~985   |                                      |          |     | no  | no  | no  | no |
| <i>SHANK1</i>        | Q9Y566 | 2161 | 212~395   |                                      |          | 253 | yes | yes | yes | no |
| <i>SHANK2</i>        | Q9UPX8 | 1470 | 167~392   |                                      |          |     | no  | yes | no  | no |
| <i>SHANK3</i>        | Q9BYB0 | 1731 | 148~345   |                                      |          | 167 | yes | yes | yes | no |
| <i>TANCI</i>         | Q9C0D5 | 1861 | 896~1272  |                                      |          |     | no  | no  | yes | no |

|               |        |      |          |                                                        |                                 |     |     |     |     |     |
|---------------|--------|------|----------|--------------------------------------------------------|---------------------------------|-----|-----|-----|-----|-----|
| <i>TANC2</i>  | Q9HCD6 | 1990 | 846~1227 |                                                        |                                 |     | no  | no  | yes | no  |
| <i>TNKS</i>   | O95271 | 1327 | 181~964  | 210, 327, 507, 659,<br>767, 771, 791, 812,<br>821, 932 | 320, 500, 576, 784,<br>805, 806 | N/A | yes | no  | yes | no  |
| <i>TNKS2</i>  | Q9H2K2 | 1166 | 57~776   | 169, 225, 398, 425,<br>510, 633, 654, 663              | 58, 425, 633, 654,<br>655       | N/A | yes | no  | yes | no  |
| <i>TONSL</i>  | Q96HA7 | 1378 | 528~626  |                                                        |                                 | N/A | no  | no  | yes | no  |
| <i>TRPC4</i>  | Q9UBN4 | 977  | 31~170   |                                                        |                                 |     | no  | no  | yes | no  |
| <i>TRPV4</i>  | Q9HBA0 | 871  | 237~398  |                                                        | 344,352                         |     | yes | no  | no  | no  |
| <i>TRPV5</i>  | Q9NQA5 | 729  | 44~268   |                                                        | 57                              |     | yes | no  | yes | yes |
| <i>UACA</i>   | Q9BZF9 | 1416 | 38~228   |                                                        |                                 |     | no  | no  | yes | no  |
| <i>YTHDC2</i> | Q9H6S0 | 1430 | 506~571  |                                                        |                                 |     | no  | yes | no  | no  |

Table S4: Related to Figure 1, 3, 4, and 7, Figure S1, S3, S5, and S8. Sequences of oligos used this study.

| Primer name           | Reporter name                                                                           | Sequence                                                                          |
|-----------------------|-----------------------------------------------------------------------------------------|-----------------------------------------------------------------------------------|
| AnkG 1-807 F          | HA-AnkG <sup>1-807</sup>                                                                | AAGGAATTCGGTACCATGAGTGAAGAGCCAAA                                                  |
| AnkG 1-807 R          |                                                                                         | GCGGCCGCACTCGAGCTAGGTCATAATTTCT                                                   |
| AnkG 808-1475 F       | HA-AnkG <sup>808-1475</sup>                                                             | AAGGAATTCGGTACCATGACCACTACCATCAC                                                  |
| AnkG 808-1475 R       |                                                                                         | GCGGCCGCACTCGAGCTAACAAGGACTCTGCG                                                  |
| AnkG 1476-1961 F      | HA-AnkG <sup>1476-1961</sup>                                                            | AAGGAATTCGGTACCATGGAGCGGACGGATAT                                                  |
| AnkG 1476-1961 R      |                                                                                         | GCGGCCGCACTCGAGCTAGTGGGTTTTCTTCT                                                  |
| AnkG 808-1961 F       | HA-AnkG <sup>808-1961</sup>                                                             | AAGGAATTCGGTACCATGACCACTACCATCAC                                                  |
| AnkG 808-1961 R       |                                                                                         | GCGGCCGCACTCGAGCTAGTGGGTTTTCTTCT                                                  |
| Usp9X 1555-1958 F     | Flag-Usp9X <sup>1555-1958</sup>                                                         | AAGGAATTCGGTACCATGGGATTTGTGGGGCT                                                  |
| Usp9X 1555-1958 R     |                                                                                         | GCGGCCGCACTCGAGCTATGTGTCCATTCGTT                                                  |
| GFP-AnkG F            | GFP-AnkG                                                                                | TACCGGACTCAGATCATGAGTGAAGAGCCAAA                                                  |
| GFP-AnkG R            |                                                                                         | GGCGACCGGCCGGTGGTGGGTTTTCTTCTCCA                                                  |
| GFP-Usp9X 1555-1958 F | GFP-Usp9X <sup>1555-1958</sup>                                                          | TACCGGACTCAGATCATGGGATTTGTGGGGCTG                                                 |
| GFP-Usp9X 1555-1958 R |                                                                                         | GGTGGCGACCGGCCGGTGTGTGTCCATTCGTTCT                                                |
| Usp9X 1547-1962 F     | His-Usp9X <sup>1547-1962</sup>                                                          | TACTTCCAATCCAATCCCCTGGACCCCGTCCACC                                                |
| Usp9X 1547-1962 R     |                                                                                         | TTATCCACTTCCAATTTAATGACCTATTGTGTCCA<br>TTCGTTTATA                                 |
| Mut <sup>a</sup>      | HA-AnkG <sup>1-807</sup> Mut <sup>a</sup><br>GFP-AnkG <sup>1-807</sup> Mut <sup>a</sup> | CAGGAGAACCACCTGGAAGTCGTC <u>CGG</u> TTTCTTG<br><u>CGG</u> ACAATGGCGCCAGCCAAAGCCTG |
| Mut <sup>b</sup>      | HA-AnkG <sup>1-807</sup> Mut <sup>b</sup><br>GFP-AnkG <sup>1-807</sup> Mut <sup>b</sup> | GGTGCGAAGATCGATGCCAAGACC <u>CGG</u> ACGGTG<br><u>CGA</u> CTCCGTTGCACTGTGGGGCGAGA  |
| K39A                  | HA-AnkG <sup>1-807</sup> K39A                                                           | CAGGGCACCTGGGCAAGGCCCTTGACT                                                       |
| K260A                 | HA-AnkG <sup>1-807</sup> K260A                                                          | CACGTTGCCTCGGCGGAGGAAATGCA                                                        |
| K268A                 | HA-AnkG <sup>1-807</sup> K268A                                                          | GCAAATATGGTGGCGCTATTGCTGGAC                                                       |
| S1593A                | Flag-Usp9X <sup>S3A</sup>                                                               | GAAGGCACAGGTGCTGATGTAGATGATG                                                      |
| S1600A                |                                                                                         | TAGTGATGTAGATGATGATATGGCTGGGGATGAG<br>AAGC                                        |
| S1609A                |                                                                                         | CAGGACAACGAGGCCAATGTTGATCCC                                                       |
| S1593D                | Flag-Usp9X <sup>S1593D</sup><br>His-Usp9X <sup>S1593D</sup>                             | GCCATAGAAGGCACAGGTGATGATGTAGATGATG<br>ATATGTCTGGGG                                |
| S1600D                | Flag-Usp9X <sup>S1600D</sup><br>His-Usp9X <sup>S1600D</sup>                             | GATGTAGATGATGATATGGATGGGGATGAGAAGC<br>AGGACAACG                                   |
| S1609D                | Flag-Usp9X <sup>S1609D</sup><br>His-Usp9X <sup>S1609D</sup>                             | GGATGAGAAGCAGGACAACGAGGACAATGTTGA<br>TCCCAGG                                      |
| H1878A                | His-Usp9X H1878A                                                                        | GGTCAAGCAAGTGGCGGAGCTTACTATTCTTACA<br>TCATTCAGAGG                                 |
| Q1573L                | Flag-Usp9X <sup>Q1573L</sup><br>His-Usp9X <sup>Q1573L</sup>                             | ACATGAACTCTGTGATCCTGCAACTCTATATGATC<br>CC                                         |
| L1693W                | Flag-Usp9X <sup>L1693W</sup><br>His-Usp9X <sup>L1693W</sup>                             | GTTCTTTAATTCTGGGTGGATAGTTTAGATG                                                   |
| G1890E                | Flag-Usp9X <sup>G1890E</sup><br>His-Usp9X <sup>G1890E</sup>                             | TCATTCAGAGGAATGGAGAGGATGGTGAAAAAA<br>ATCGTTG                                      |
| His-Usp9X 1547-1962 F | His-Usp9X <sup>S3A</sup>                                                                | TACTTCCAATCCAATCCCCTGGACCCCGTCCACC<br>AAAAGGATTTGTGGGGCTGAAAAATGCTGG              |
| His-Usp9X 1547-1962 R |                                                                                         | GCATATATACTTTTTTATGAACGAATGGACACAAT<br>AGGTCATTAATTGGAAGTGGATAA                   |

Underline indicates codon altered.
